# Relationship of Periodontal Bacterium Genotypic Variations With Periodontitis in Type 2 Diabetic Patients

MIKI OJIMA, DDS, PHD<sup>1</sup>  
MUNEHIRO TAKEDA, DDS<sup>2,3</sup>  
HIDEO YOSHIOKA, DDS, PHD<sup>3</sup>  
MAKOTO NOMURA, MD, PHD<sup>4</sup>

NORIAKI TANAKA, DDS, PHD<sup>3</sup>  
TAKAHIRO KATO, DDS, PHD<sup>2</sup>  
SATOSHI SHIZUKUISHI, DDS, PHD<sup>1</sup>  
ATSUO AMANO, DDS, PHD<sup>2</sup>

**P**eriodontitis is characterized by gingival inflammation, as well as loss of connective tissue and bone from around the roots of the teeth, which leads to eventual tooth exfoliation. Severe periodontitis often coexists with diabetes and is considered to be the sixth complication of the disease, as both type 1 and type 2 diabetic patients show a three- to fourfold increased risk of periodontitis (1–4). However, the involved factors and mechanisms are still unclear.

Periodontitis is caused by a small subset of periodontal Gram-negative bacteria that attach to the gingival margin, such as *Porphyromonas gingivalis*, *Actinobacillus actinomycetemcomitans*, *Tannerella forsythia*, *Treponema denticola*, and *Prevotella intermedia* (5). Among them, *P. gingivalis* is considered to be a bona fide periodontal pathogen (5–7). *P. gingivalis* fimbriae are hair-like appendages on the bacterial surface that mediate bacterial interactions with and invasion of host tissues (8). These fimbriae have been classified into six types (I through V and Ib), based on the diversity of the *fimA* genes encoding FimA (a subunit protein of fimbriae) (9,10). Studies have shown that clones with type II *fimA* have a significantly greater virulence in vitro and in vivo (10–12). Therefore, specific *P. gingivalis* *fimA*

types may be related to periodontitis associated with type 2 diabetes.

## RESEARCH DESIGN AND METHODS

— We selected 97 Japanese adults (53 men and 44 women) with type 2 diabetes with or without adult periodontitis according to a protocol approved by the Ethics Committee of Osaka Rosai Hospital. All of the subjects completed questionnaires and were excluded if antibiotics, corticosteroids, and/or non-steroidal drugs had been used during the previous 3 weeks. Subjects had >10 functional teeth and had not received professional periodontal treatment during the 6-month period before the study.

Periodontal condition was determined by measuring the level of attachment loss as described previously (13). The development of periodontitis was assessed by attachment loss level, i.e., individuals who had more than a tooth with an attachment loss of >5 mm were classified into the periodontitis group and the others comprised the nonperiodontitis group. The ratio (a percentage) of teeth with an attachment loss of >5 mm among all teeth in each subject was used as an index of periodontal deterioration.

Bacterial samples were collected from subgingival pockets and analyzed using a

PCR method as described previously (13–15). The target microorganisms were *P. gingivalis*, *A. actinomycetemcomitans*, *T. forsythia*, *T. denticola*, and *P. intermedia*. *P. gingivalis* *fimA* types were also analyzed. Statistical analyses were performed using a *t* test and  $\chi^2$  test.

**RESULTS** — General condition and bacterial occurrence were analyzed in relation to periodontitis development. No significant differences were found in sex, BMI (mean  $23.6 \pm 4.9$  kg/m<sup>2</sup>), HbA<sub>1c</sub> level ( $9.6 \pm 2.0\%$ ), and disease duration ( $8.5 \pm 7.6$  years) between the periodontitis and nonperiodontitis groups, but age was significant (Table 1). Of the five periodontal bacteria, only the occurrence of *P. gingivalis* was significantly different between the two groups, and its type II *fimA* clone was more predominant in the periodontitis group (42.0%) than in the nonperiodontitis group (35.7%) but not significantly. The ratio of teeth with an attachment loss of >5 mm, used as an index of periodontitis deterioration, varied from 3.3 to 100.0% (means  $\pm$  SD  $30.5 \pm 27.6\%$ ) in the periodontitis group. *P. gingivalis* was found to be the only pathogen with a significant relationship to periodontitis deterioration (Table 1). Among the six genotypes of *P. gingivalis*, the occurrence of type II *fimA* clone was significantly associated with disease deterioration. On the other hand, type I and IV *fimA* clones showed a tendency to be negatively associated with the deterioration. Furthermore, a regression model was constructed to independently confirm the relationship of *P. gingivalis* type II *fimA* with deterioration of periodontitis, which included age and sex as adjusting variables. This model indicated that the occurrence of type II *fimA* clone was independently related to periodontitis deterioration (standard regression coefficient 0.274, *P* = 0.025), but age and sex were not.

**CONCLUSIONS** — *P. gingivalis* is reported to be the most frequently detected pathogen in periodontitis diseased sites of

From the <sup>1</sup>Department of Preventive Dentistry, Osaka University Graduate School of Dentistry, Suita, Osaka, Japan; the <sup>2</sup>Department of Oral Frontier Biology, Osaka University Graduate School of Dentistry, Suita, Osaka, Japan; the <sup>3</sup>Department of Dentistry and Oral Surgery, Sakai, Osaka, Japan; and the <sup>4</sup>Department of Internal Medicine, Center for Diabetes Mellitus, Osaka Rosai Hospital, Sakai, Osaka, Japan.

Address correspondence and reprint requests to Atsuo Amano DDS, PhD, Department of Oral Frontier Biology, Osaka University Graduate School of Dentistry, 1-8 Yamadaoka, Suita-Osaka 565-0871, Japan. E-mail: amanoa@dent.osaka-u.ac.jp.

Received for publication 28 October 2004 and accepted in revised form 29 October 2004.

A table elsewhere in this issue shows conventional and Système International (SI) units and conversion factors for many substances.

© 2005 by the American Diabetes Association.

The costs of publication of this article were defrayed in part by the payment of page charges. This article must therefore be hereby marked "advertisement" in accordance with 18 U.S.C. Section 1734 solely to indicate this fact.

**Table 1—Factors related to the development and deterioration of periodontitis in type 2 diabetic patients**

|                                                          | Subjects                    |                         |
|----------------------------------------------------------|-----------------------------|-------------------------|
|                                                          | Nonperiodontitis            | Periodontitis           |
| Factors related to the development                       |                             |                         |
| Age (years)*                                             | 53.7 ± 14.1                 | 59.5 ± 1.3              |
| <i>P. gingivalis</i> (all <i>fimA</i> types)†            | 50.0                        | 79.7                    |
|                                                          | Ratio of diseased teeth (%) |                         |
|                                                          | Occurrence <sup>−</sup>     | Occurrence <sup>+</sup> |
| <i>P. gingivalis</i> clones related to the deterioration |                             |                         |
| <i>P. gingivalis</i> (all <i>fimA</i> types)*            | 26.4 ± 28.8                 | 31.5 ± 27.4             |
| I                                                        | 32.7 ± 28.1                 | 13.2 ± 14.8             |
| II*                                                      | 24.0 ± 24.3                 | 39.4 ± 29.7             |
| III                                                      | 30.4 ± 27.5                 | 31.2 ± 29.4             |
| IV                                                       | 32.4 ± 28.6                 | 19.2 ± 17.2             |
| Ib                                                       | 28.2 ± 27.4                 | 45.5 ± 25.2             |

Data are means ± SD and %. Type V *fimA* was excluded for the deterioration due to the insufficiently small number of subjects possessing that type. \* $P < 0.05$  by  $t$  test, † $P < 0.05$  by  $\chi^2$  test.

type 2 diabetic and nondiabetic populations (16,17). In the present study, *P. gingivalis* type II *fimA* was found to have a significant association with deterioration of periodontitis, whereas types I and IV clones were not related to disease progression. We previously reported that the occurrence of type II *fimA* clones is significantly correlated with both the development and deterioration of periodontitis in systemic healthy subjects, as compared with other *fimA* types, while the most prevalent *fimA* type in periodontal healthy sites was type I (9,14). Other studies performed in different countries with systemic healthy populations have confirmed our findings (18–20). Similar findings have been reported in Down's syndrome patients, who are congenitally susceptible to periodontitis, and in young adults with mental disability, a major factor in determining oral hygiene (13).

Diabetic patients are at greater risk of developing periodontitis due to their high susceptibility to infection (7). The present findings also suggest that *P. gingivalis* clones, even with lower pathogenicity, can lead to periodontitis in diabetic patients. They hardly respond to periodontal therapy (7); thus, patients infected with the type II clone require careful attention to bacteria elimination and periodontal management by professional periodontists.

## References

1. Løe H: Periodontal disease: the sixth complication of diabetes mellitus. *Diabetes Care* 16:329–334, 1993
2. Nelson R, Shlossman M, Budding L, Pettitt DJ, Saad MF, Genco RJ, Knowler WC: Periodontal disease and NIDDM in Pima Indians. *Diabetes Care* 13:836–840, 1990
3. Emrich L, Shlossman M, Genco RJ: Periodontal disease in non-insulin-dependent diabetes mellitus. *J Periodontol* 62:123–131, 1991
4. Taylor G, Burt B, Becker M, Genco RJ, Shlossman M, Knowler WC, Pettitt DJ: Non-insulin dependent diabetes mellitus and alveolar bone loss progression over 2 years. *J Periodontol* 69:76–83, 1998
5. Darveau RP, Tanner A, Page RC: The microbial challenge in periodontitis. *Periodontol* 2000 14:12–32, 1997
6. Williams RC, Offenbacher S: Periodontal medicine: the emergence of a new branch of periodontology. *Periodontol* 2000 23:9–12, 2000
7. Genco RJ: Current view of risk factors for periodontal diseases. *J Periodontol* 67:1041–1049, 1996
8. Amano A: Molecular interaction of *Porphyromonas gingivalis* with host cells: implication for the microbial pathogenesis of periodontal disease. *J Periodontol* 74:90–96, 2003
9. Amano A, Kuboniwa M, Nakagawa I, Akiyama S, Morisaki I, Hamada S: Prevalence of specific genotypes of *Porphyromonas gingivalis fimA* and periodontal health status. *J Dent Res* 79:1664–1668, 2000
10. Amano A, Nakagawa I, Okahashi N, Hamada S: Variations of *Porphyromonas gingivalis* fimbriae in relation to microbial pathogenesis. *J Periodontol Res* 39:136–142, 2004
11. Nakano K, Kuboniwa M, Nakagawa I, Yamamura T, Nomura R, Okahashi N, Ooshima T, Amano A: Comparison of inflammatory changes caused by *Porphyromonas gingivalis* with distinct *fimA* genotypes in a mouse abscess model. *Oral Microbiol Immunol* 19:205–209, 2004
12. Nakagawa I, Amano A, Kuboniwa M, Nakamura T, Kawabata S, Hamada S: Functional differences among *FimA* variants of *Porphyromonas gingivalis* and their effects on adhesion to and invasion of human epithelial cells. *Infect Immun* 70:277–285, 2002
13. Amano A, Kishima T, Akiyama S, Nakagawa I, Hamada S, Morisaki I: Relationship of periodontopathic bacteria with early-onset periodontitis in Down's syndrome. *J Periodontol* 72:368–373, 2001
14. Amano A, Nakagawa I, Kataoka K, Morisaki I, Hamada S: Distribution of *Porphyromonas gingivalis* strains with *fimA* genotypes in periodontitis patients. *J Clin Microbiol* 37:1426–1430, 1999
15. Nakagawa I, Amano A, Ohara-Nemoto Y, Endoh N, Morisaki I, Kimura S, Kawabata S, Hamada S: Identification of a new variant of *fimA* gene of *Porphyromonas gingivalis* and its distribution in adults and disabled populations with periodontitis. *J Periodontol Res* 37:425–432, 2002
16. Yuan K, Chang CJ, Hsu PC, Sun HS, Tseng CC, Wang JR: Detection of putative periodontal pathogens in non-insulin-dependent diabetes mellitus and non-diabetes mellitus by polymerase chain reaction. *J Periodontol Res* 36:18–24, 2001
17. Tervonen T, Oliver RC, Wolff LF, Beruter J, Anderson LA, Aeppli DM: Prevalence of periodontal pathogens with varying metabolic control of diabetes mellitus. *J Clin Periodontol* 21:375–379, 1994
18. Missailidis CG, Umeda JE, Ota-Tsuzuki C, Anzai D, Mayer MP: Distribution of *fimA* genotypes of *Porphyromonas gingivalis* in subjects with various periodontal conditions. *Oral Microbiol Immunol* 19:224–229, 2004
19. van der Ploeg JR, Giertsens E, Ludin B, Morgeli C, Zinkernagel AS, Gmur R: Quantitative detection of *Porphyromonas gingivalis fimA* genotypes in dental plaque. *FEMS Microbiol Lett* 12:31–37, 2004
20. Beikler T, Peters U, Prajanah S, Prior K, Ehmke B, Flemmig TF: Prevalence of *Porphyromonas gingivalis fimA* genotypes in Caucasians. *Eur J Oral Sci* 111:390–394, 2003
